# Supplementary material for: In Utero Exposure to Benzo[a]Pyrene Increases Mutation Burden in the Soma and Sperm of Adult Mice
Source: PubMed Central journal article supplement (PMC5226697; doi:10.1289/ehp211), 2016-07-22
Supplement: EHP211.s001.acco.pdf [file EHP211.s001.acco.pdf]

**Note to readers with disabilities:** *EHP* strives to ensure that all journal content is accessible to all readers. However, some figures and Supplemental Material published in *EHP* articles may not conform to [508 standards](#) due to the complexity of the information being presented. If you need assistance accessing journal content, please contact [ehp508@niehs.nih.gov](mailto:ehp508@niehs.nih.gov). Our staff will work with you to assess and meet your accessibility needs within 3 working days.

## **Supplemental Material**

### ***In Utero* Exposure to Benzo[a]Pyrene Increases Mutation Burden in the Soma and Sperm of Adult Mice**

Matthew J. Meier, Jason M. O'Brien, Marc A. Beal, Beverly Allan, Carole L. Yauk, and  
Francesco Marchetti

#### **Table of Contents**

**Figure S1.** Number of mutations occurring after various animal exposures to BaP normalized to total quantity of BaP exposure (see Table S2). Each data point represents the mean value for a different dose group. BM: bone marrow; LV: liver; BR: brain.

**Figure S2.** Dose-response modeling of the brain of F1 males exposed *in utero*. The BMDS software v2.6 was used with a BMR of 1 standard deviation with non-constant variance that adequately modeled the data. These parameters were chosen to allow comparison with existing cancer benchmark dose analysis from (Moffat et al. 2015).

**Table S1.** Summary of *lacZ* mutant frequency in somatic and germ tissues of Muta<sup>TM</sup>Mouse males exposed to BaP *in utero* during the period of organogenesis.

**Table S2.** Mutant frequencies expressed per cumulative dose of BaP administered in this study and in previously exposed adult Muta<sup>TM</sup>Mouse males. The source of each *lacZ* mutant frequency data is stated below.

**Table S3.** Comparison of clonal expansion of *lacZ* mutants in control mice and mice exposed to BaP either *in utero* or as adults.

**Table S4.** Non-normalized raw data output from computer-assisted sperm analysis (CASA).

**Table S5.** Raw data used to generate Figure 2A and Figure 2D, liver and testes somatic indices.

**Supporting References**

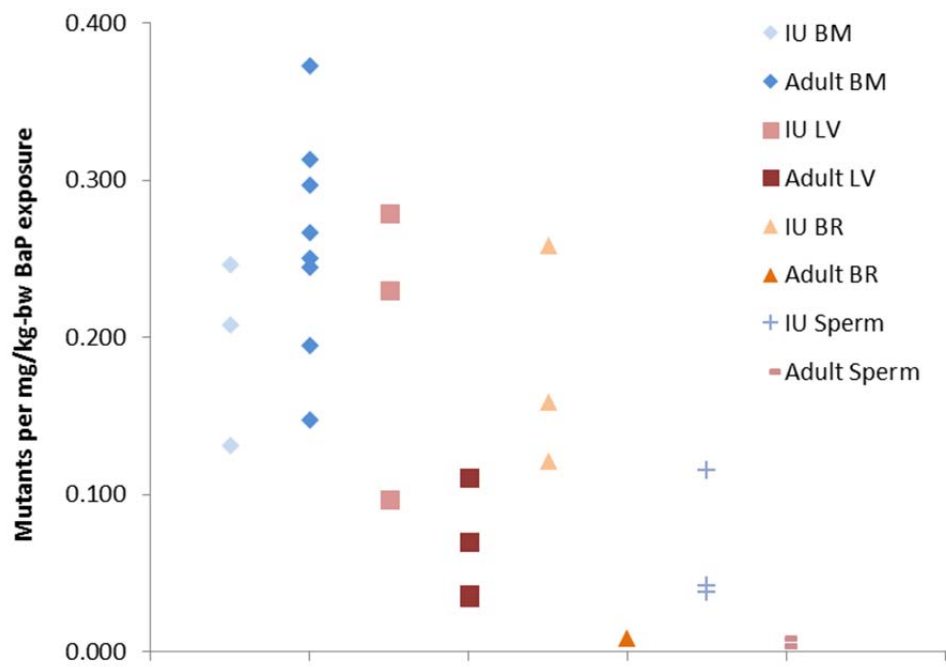

**Figure S1.** Number of mutations occurring after various animal exposures to BaP normalized to total quantity of BaP exposure (see Table S2). Each data point represents the mean value for a different dose group. BM: bone marrow; LV: liver; BR: brain.

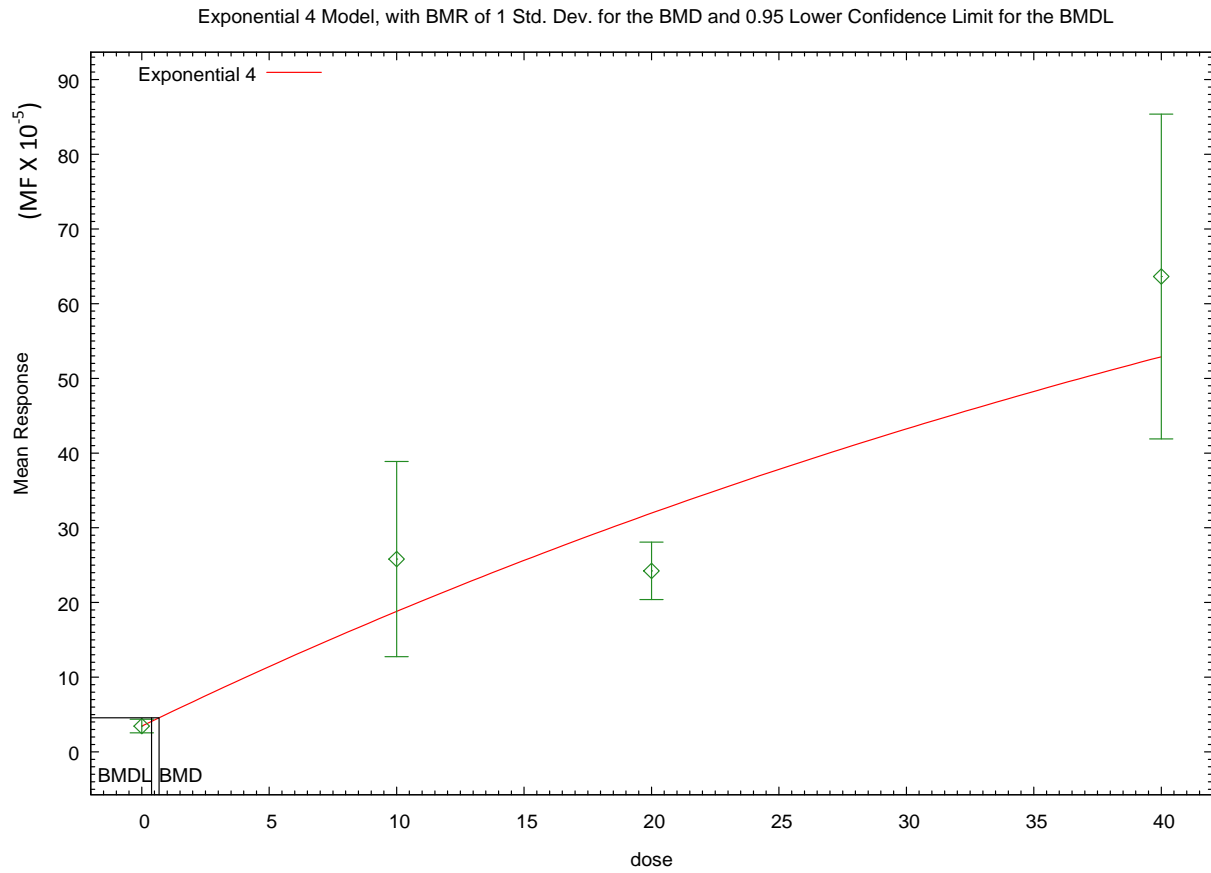

16:02 05/29 2015

**Figure S2.** Dose-response modeling of the brain of F1 males exposed *in utero*. The BMDS software v2.6 was used with a BMR of 1 standard deviation with non-constant variance that adequately modeled the data. These parameters were chosen to allow comparison with existing cancer benchmark dose analysis from (Moffat et al. 2015).

**Table S1.** Summary of *lacZ* mutant frequency in somatic and germ tissues of Muta™Mouse males exposed to BaP *in utero* during the period of organogenesis.

| <b>Tissue</b>       | <b>Dose administered to dam (mg/kg/d)</b> | <b>No of F1 animals</b> | <b>Avg<sup>a</sup> MF (×10<sup>5</sup>)</b> | <b>SE<sup>b</sup></b> | <b>P-value<sup>c</sup></b> | <b>Total Mutants</b> | <b>Total Plaque Forming Units</b> |
|---------------------|-------------------------------------------|-------------------------|---------------------------------------------|-----------------------|----------------------------|----------------------|-----------------------------------|
| <b>Bone marrow</b>  | 0                                         | 16                      | 6.2                                         | 2.19                  | –                          | 169                  | 3,148,992                         |
|                     | 10                                        | 9                       | 13.1                                        | 4.03                  | 0.1323                     | 379                  | 2,561,041                         |
|                     | 20                                        | 18                      | 41.6                                        | 5.46                  | <0.0001                    | 1,874                | 4,205,448                         |
|                     | 40                                        | 8                       | 98.5                                        | 14.05                 | <0.0001                    | 1,172                | 1,291,372                         |
| <b>Brain</b>        | 0                                         | 8                       | 3.5                                         | 0.87                  | –                          | 67                   | 2,037,037                         |
|                     | 10                                        | 5                       | 25.8                                        | 3.13                  | <0.0001                    | 348                  | 1,290,543                         |
|                     | 20                                        | 15                      | 24.2                                        | 2.24                  | <0.0001                    | 582                  | 2,330,433                         |
|                     | 40                                        | 8                       | 63.6                                        | 4.86                  | <0.0001                    | 659                  | 1,146,192                         |
| <b>Liver</b>        | 0                                         | 14                      | 3.4                                         | 1.18                  | –                          | 101                  | 2,584,069                         |
|                     | 10                                        | 11                      | 9.7                                         | 1.91                  | 0.0378                     | 252                  | 2,533,872                         |
|                     | 20                                        | 15                      | 45.9                                        | 3.83                  | <0.0001                    | 1,347                | 2,920,372                         |
|                     | 40                                        | 7                       | 111.5                                       | 8.00                  | <0.0001                    | 1,508                | 1,478,244                         |
| <b>Caudal sperm</b> | 0                                         | 27                      | 2.9                                         | 0.31                  | –                          | 266                  | 10,285,084                        |
|                     | 10                                        | 17                      | 3.8                                         | 0.43                  | 0.1509                     | 263                  | 7,261,336                         |
|                     | 20                                        | 11                      | 8.5                                         | 0.97                  | <0.0001                    | 254                  | 3,188,918                         |
|                     | 40                                        | 2                       | 46.3                                        | 39.58                 | 0.0003                     | 7                    | 12,922                            |
| <b>Whole testes</b> | 0                                         | 6                       | 2.1                                         | 0.92                  | –                          | 40                   | 1,845,468                         |
|                     | 10                                        | 4                       | 7.2                                         | 1.77                  | 0.0888                     | 110                  | 1,594,804                         |
|                     | 20                                        | 12                      | 21.8                                        | 2.02                  | <0.0001                    | 770                  | 3,681,859                         |
|                     | 40                                        | 3                       | 77.6                                        | 8.12                  | <0.0001                    | 680                  | 862,129                           |

<sup>a</sup>Arithmetic mean of mutant frequency (MF) of all animals in group

<sup>b</sup>Standard error (SE) calculated using the esticon function in the doBy R package

<sup>c</sup>Generalized linear model in R with quasi-Poisson distribution and Bonferonni correction

**Table S2.** Mutant frequencies expressed per cumulative dose of BaP administered in this study and in previously exposed adult Muta<sup>TM</sup>Mouse males. The source of each *lacZ* mutant frequency data is stated below.

| <b>Tissue</b> | <b>Exposure</b>        | <b>Length of exposure + time until euthanasia</b> | <b>Avg. mutants per mg/kg-bw</b> | <b>Fold difference between <i>in utero</i> and adult BaP exposure</b> |
|---------------|------------------------|---------------------------------------------------|----------------------------------|-----------------------------------------------------------------------|
| Bone marrow   | <i>In utero</i>        | 10 d + 10 wk                                      | 0.195                            | <b>0.75</b>                                                           |
| Brain         | <i>In utero</i>        | 10 d + 10 wk                                      | 0.179                            | <b>19.3</b>                                                           |
| Liver         | <i>In utero</i>        | 10 d + 10 wk                                      | 0.202                            | <b>3.2</b>                                                            |
| Sperm         | <i>In utero</i>        | 10 d + 10 wk                                      | 0.066                            | <b>11.4</b>                                                           |
| Bone marrow   | Adult <sup>a,b,c</sup> | 28 d + 3 d                                        | 0.261                            |                                                                       |
| Brain         | Adult <sup>c</sup>     | 5 d + 14 d                                        | 0.009                            |                                                                       |
| Liver         | Adult <sup>d</sup>     | 28 d + 3 d                                        | 0.063                            |                                                                       |
| Sperm         | Adult <sup>a</sup>     | 28 d + 42 d                                       | 0.006                            |                                                                       |

<sup>a</sup>O'Brien et al. (2016)

<sup>b</sup>Beal et al. (2015).

<sup>c</sup>Hakura et al. (1998).

<sup>d</sup>Lemieux et al. (2011).

**Table S3.** Comparison of clonal expansion of *lacZ* mutants in control mice and mice exposed to BaP either *in utero* or as adults.

| Tissue (study)                    | Exposure | # unique mutations | # clonally expanded | % clonally expanded | Ratio (BaP:control) | Fisher's exact test p-value |
|-----------------------------------|----------|--------------------|---------------------|---------------------|---------------------|-----------------------------|
| Bone Marrow ( <i>in utero</i> )   | Control  | 50                 | 11                  | 22%                 | 1.55                | 0.1171                      |
|                                   | Treated  | 155                | 53                  | 34%                 |                     |                             |
| Bone Marrow (adult) <sup>a</sup>  | Control  | 152                | 11                  | 8%                  | 1.25                | 0.5362                      |
|                                   | Treated  | 854                | 78                  | 10%                 |                     |                             |
| Brain ( <i>in utero</i> )         | Control  | 49                 | 2                   | 4%                  | 4.27                | <b>0.0153</b>               |
|                                   | Treated  | 235                | 41                  | 17%                 |                     |                             |
| Caudal sperm ( <i>in utero</i> )  | Control  | 54                 | 8                   | 15%                 | 1.97                | <b>0.0792</b>               |
|                                   | Treated  | 65                 | 19                  | 29%                 |                     |                             |
| Caudal sperm (adult) <sup>b</sup> | Control  | 131                | 18                  | 16%                 | 0.63                | 0.1247                      |
|                                   | Treated  | 295                | 26                  | 10%                 |                     |                             |
| Liver ( <i>in utero</i> )         | Control  | 80                 | 3                   | 4%                  | 2.07                | 0.2901                      |
|                                   | Treated  | 193                | 15                  | 8%                  |                     |                             |

<sup>a</sup>Beal et al. (2015).

<sup>b</sup>O'Brien et al. (2016)

**Table S4.** Non-normalized raw data output from computer-assisted sperm analysis (CASA).

| ID    | Study    | Dose Group | TOTAL COUNT | TOTAL CONC | MOTILE COUNT | MOTILE % | PROGRESSIVE % | VAP   | VSL  | VCL   | ALH  | BCF  | STR  | LIN  | ELONGATION | SIZE |
|-------|----------|------------|-------------|------------|--------------|----------|---------------|-------|------|-------|------|------|------|------|------------|------|
| 1-1m  | BaP IU-1 | Control    | 2937.5      | 15.0       | 1588.5       | 54.5     | 21.5          | 118.9 | 87.8 | 242.1 | 12.1 | 41.5 | 68.5 | 35.0 | 51.5       | 37.6 |
| 3-1m  | BaP IU-1 | Control    | 3236.0      | 11.2       | 1514.5       | 48.0     | 17.5          | 112.2 | 81.8 | 226.2 | 12.0 | 38.6 | 67.5 | 34.5 | 56.5       | 30.4 |
| 5-1m  | BaP IU-1 | Control    | 2312.0      | 11.8       | 1055.0       | 45.5     | 17.0          | 107.5 | 78.9 | 210.4 | 11.6 | 38.6 | 66.0 | 35.0 | 58.0       | 29.9 |
| 5-2m  | BaP IU-1 | Control    | 2780.5      | 7.1        | 603.0        | 21.5     | 7.5           | 77.4  | 58.0 | 152.8 | 9.0  | 35.8 | 71.5 | 38.0 | 62.5       | 25.4 |
| 7-1m  | BaP IU-1 | Control    | 3996.0      | 10.2       | 1849.5       | 46.0     | 16.0          | 102.5 | 74.8 | 205.3 | 11.4 | 38.8 | 65.5 | 34.5 | 58.0       | 26.8 |
| 7-3m  | BaP IU-1 | Control    | 2419.5      | 12.4       | 1259.0       | 52.0     | 22.0          | 124.6 | 93.6 | 247.0 | 12.0 | 40.4 | 70.0 | 37.0 | 55.5       | 32.7 |
| 7-4m  | BaP IU-1 | Control    | 2469.5      | 7.6        | 871.0        | 40.0     | 18.0          | 110.8 | 82.8 | 230.9 | 11.2 | 41.4 | 69.5 | 35.5 | 52.0       | 31.3 |
| 7-5m  | BaP IU-1 | Control    | 3287.5      | 11.8       | 1473.5       | 46.0     | 17.5          | 107.9 | 79.5 | 217.1 | 11.3 | 39.7 | 67.5 | 35.5 | 57.0       | 30.2 |
| 9-1m  | BaP IU-1 | Control    | 4633.0      | 16.2       | 1980.5       | 44.5     | 14.5          | 109.3 | 78.7 | 218.4 | 12.9 | 38.0 | 66.0 | 34.5 | 62.0       | 26.6 |
| 9-2m  | BaP IU-1 | Control    | 3848.0      | 13.0       | 1800.5       | 48.0     | 17.0          | 104.1 | 74.0 | 209.1 | 11.6 | 39.0 | 63.0 | 32.5 | 54.5       | 32.2 |
| 11-1m | BaP IU-1 | Control    | 2717.0      | 9.5        | 1271.0       | 47.0     | 15.5          | 92.9  | 64.8 | 202.4 | 10.7 | 40.6 | 63.0 | 30.5 | 54.0       | 28.8 |
| 11-2m | BaP IU-1 | Control    | 2753.5      | 11.3       | 1220.0       | 44.0     | 16.5          | 98.2  | 72.9 | 191.8 | 10.6 | 39.3 | 66.0 | 35.0 | 53.5       | 29.6 |
| 11-3m | BaP IU-1 | Control    | 3490.5      | 7.1        | 1504.5       | 43.0     | 14.0          | 88.1  | 62.7 | 183.3 | 10.7 | 39.3 | 64.0 | 33.0 | 56.0       | 26.7 |
| 23CM1 | BaP IU-2 | Control    | 1865.0      | 3.8        | 898.0        | 46.0     | 32.5          | 118.1 | 81.5 | 271.3 | 14.2 | 38.0 | 65.5 | 30.5 | 61.5       | 22.1 |
| 26CM1 | BaP IU-2 | Control    | 1510.0      | 4.1        | 632.5        | 41.0     | 21.5          | 84.7  | 46.0 | 169.0 | 10.5 | 29.8 | 55.0 | 28.5 | 54.5       | 32.5 |
| 27CM1 | BaP IU-2 | Control    | 2475.5      | 6.7        | 1759.0       | 71.0     | 47.0          | 125.9 | 86.2 | 273.4 | 13.7 | 40.3 | 65.5 | 32.0 | 47.5       | 46.6 |
| 29CM1 | BaP IU-2 | Control    | 2350.5      | 6.4        | 1368.5       | 58.0     | 40.0          | 122.2 | 87.7 | 266.3 | 13.6 | 40.3 | 67.5 | 32.0 | 45.0       | 44.4 |
| 30CM1 | BaP IU-2 | Control    | 2307.0      | 6.3        | 1542.5       | 66.5     | 47.5          | 118.6 | 87.6 | 253.3 | 12.4 | 42.5 | 69.0 | 33.5 | 45.0       | 45.7 |
| 4-1m  | BaP IU-1 | BaP 10     | 2187.0      | 5.6        | 928.5        | 42.0     | 18.0          | 109.1 | 84.8 | 205.8 | 10.9 | 38.1 | 71.0 | 39.0 | 57.0       | 25.8 |
| 4-3m  | BaP IU-1 | BaP 10     | 2531.5      | 6.5        | 1248.0       | 48.5     | 18.0          | 97.5  | 72.8 | 198.5 | 11.0 | 36.7 | 70.5 | 37.5 | 56.0       | 25.5 |
| 6-1m  | BaP IU-1 | BaP 10     | 3013.0      | 10.7       | 1411.0       | 46.0     | 16.0          | 123.2 | 89.0 | 246.9 | 13.4 | 38.0 | 65.5 | 34.0 | 64.5       | 22.4 |
| 6-2m  | BaP IU-1 | BaP 10     | 2715.0      | 13.8       | 1275.0       | 46.5     | 18.0          | 122.2 | 90.6 | 237.2 | 12.2 | 39.8 | 67.0 | 35.5 | 57.5       | 30.9 |
| 6-4m  | BaP IU-1 | BaP 10     | 3394.5      | 8.7        | 1700.0       | 49.5     | 16.0          | 105.5 | 74.7 | 220.0 | 11.9 | 39.7 | 64.5 | 32.0 | 56.5       | 27.6 |
| 8-1m  | BaP IU-1 | BaP 10     | 2584.0      | 13.2       | 1084.5       | 42.0     | 16.0          | 112.9 | 83.8 | 214.1 | 12.1 | 37.7 | 66.0 | 35.5 | 61.0       | 25.8 |
| 10-1m | BaP IU-1 | BaP 10     | 2819.0      | 11.5       | 1210.0       | 43.0     | 17.5          | 100.1 | 75.1 | 197.4 | 10.6 | 39.6 | 66.5 | 35.0 | 54.5       | 30.6 |
| 10-2m | BaP IU-1 | BaP 10     | 4299.5      | 8.8        | 1659.0       | 38.0     | 12.0          | 90.3  | 62.4 | 190.5 | 11.1 | 38.3 | 62.0 | 31.5 | 59.5       | 24.3 |
| 12-1m | BaP IU-1 | BaP 10     | 3140.5      | 8.0        | 1590.5       | 50.5     | 19.5          | 103.9 | 76.7 | 211.8 | 11.5 | 39.6 | 68.5 | 34.5 | 54.0       | 29.6 |



|       |          |        |        |     |        |      |      |       |       |       |      |      |      |      |      |      |
|-------|----------|--------|--------|-----|--------|------|------|-------|-------|-------|------|------|------|------|------|------|
| 28BM1 | BaP IU-2 | BaP 20 | 408.5  | 1.2 | 38.5   | 9.5  | 6.5  | 68.9  | 54.3  | 125.2 | 7.8  | 31.1 | 74.0 | 44.5 | 45.5 | 31.2 |
| 29BM1 | BaP IU-2 | BaP 20 | 1338.0 | 3.6 | 324.5  | 24.5 | 17.0 | 116.3 | 88.9  | 218.0 | 9.9  | 38.9 | 72.0 | 41.0 | 47.0 | 35.3 |
| 29BM2 | BaP IU-2 | BaP 20 | 708.0  | 2.0 | 137.5  | 19.5 | 14.0 | 118.5 | 89.4  | 234.0 | 11.9 | 30.7 | 70.5 | 38.0 | 46.0 | 31.0 |
| 29BM3 | BaP IU-2 | BaP 20 | 1553.0 | 4.2 | 827.0  | 53.5 | 39.0 | 122.5 | 96.9  | 251.3 | 11.2 | 42.5 | 74.0 | 38.0 | 44.0 | 44.5 |
| 29BM4 | BaP IU-2 | BaP 20 | 286.0  | 0.8 | 21.5   | 8.0  | 6.5  | 67.2  | 55.6  | 123.4 | 6.9  | 32.3 | 79.0 | 46.0 | 51.5 | 29.0 |
| 29BM5 | BaP IU-2 | BaP 20 | 1080.5 | 3.0 | 633.5  | 58.0 | 46.0 | 128.6 | 103.1 | 256.8 | 10.8 | 43.0 | 75.5 | 39.5 | 39.0 | 40.5 |
| 30BM1 | BaP IU-2 | BaP 20 | 2683.0 | 7.3 | 1084.0 | 40.5 | 25.0 | 100.0 | 73.2  | 212.1 | 12.1 | 38.1 | 68.5 | 33.5 | 53.5 | 32.4 |
| 33BM1 | BaP IU-3 | BaP 20 | 1026.5 | 4.2 | 103.0  | 10.0 | 6.0  | 87.9  | 61.0  | 188.1 | 9.0  | 35.2 | 64.0 | 34.5 | 53.5 | 26.9 |
| 33BM2 | BaP IU-3 | BaP 20 | 1497.0 | 6.2 | 206.0  | 14.0 | 10.0 | 93.5  | 71.6  | 185.9 | 8.8  | 38.0 | 71.0 | 39.0 | 45.5 | 37.7 |
| 34BM1 | BaP IU-3 | BaP 20 | 1103.7 | 4.5 | 9.3    | 3.7  | 1.0  | 16.2  | 9.1   | 32.2  | 1.2  | 17.3 | 39.0 | 24.0 | 51.7 | 37.2 |
| 34BM2 | BaP IU-3 | BaP 20 | 289.0  | 1.2 | 4.0    | 1.0  | 0.0  | 37.2  | 21.0  | 97.5  | 0.0  | 26.0 | 64.0 | 24.0 | 81.0 | 3.5  |
| 34BM3 | BaP IU-3 | BaP 20 | 188.0  | 0.8 | 7.0    | 4.0  | 1.0  | 25.9  | 15.3  | 62.9  | 10.5 | 27.7 | 64.0 | 31.0 | 91.0 | 6.0  |
| 34BM4 | BaP IU-3 | BaP 20 | 286.0  | 1.2 | 8.0    | 2.5  | 2.0  | 65.6  | 54.1  | 111.3 | 6.8  | 32.3 | 76.5 | 46.5 | 51.5 | 33.1 |
| 35BM1 | BaP IU-3 | BaP 20 | 1363.0 | 5.6 | 415.5  | 30.5 | 19.5 | 112.3 | 84.2  | 229.3 | 11.2 | 42.0 | 68.5 | 36.5 | 51.0 | 29.4 |
| 35BM2 | BaP IU-3 | BaP 20 | 817.0  | 3.4 | 127.5  | 15.5 | 10.5 | 76.8  | 53.7  | 149.6 | 7.8  | 33.3 | 68.0 | 38.5 | 51.0 | 31.7 |
| 36BM1 | BaP IU-3 | BaP 20 | 1386.5 | 5.7 | 445.5  | 32.0 | 22.0 | 132.6 | 100.7 | 257.0 | 12.4 | 38.7 | 71.5 | 38.5 | 46.5 | 32.8 |
| 36BM2 | BaP IU-3 | BaP 20 | 322.0  | 1.8 | 27.0   | 7.0  | 4.5  | 117.8 | 94.5  | 201.1 | 7.3  | 40.1 | 70.5 | 49.0 | 52.5 | 27.1 |
| 25AM1 | BaP IU-2 | BaP 40 | 258.5  | 0.7 | 15.0   | 6.0  | 4.0  | 66.6  | 46.9  | 123.4 | 6.2  | 31.5 | 68.5 | 39.0 | 58.0 | 20.6 |
| 27AM1 | BaP IU-2 | BaP 40 | 150.0  | 0.4 | 2.0    | 1.0  | 0.0  | 18.0  | 13.6  | 30.5  | 0.0  | 45.0 | 76.0 | 45.0 | 78.0 | 9.2  |
| 27AM2 | BaP IU-2 | BaP 40 | 257.0  | 0.7 | 9.0    | 3.0  | 0.0  | 11.6  | 7.8   | 36.5  | 0.0  | 20.0 | 39.0 | 19.0 | 41.0 | 3.8  |
| 30AM1 | BaP IU-2 | BaP 40 | 228.0  | 0.6 | 10.0   | 4.0  | 2.0  | 47.6  | 30.7  | 114.6 | 8.6  | 42.1 | 65.5 | 29.0 | 60.0 | 20.9 |
| 32AM1 | BaP IU-3 | BaP 40 | 66.0   | 0.4 | 0.5    | 0.5  | 0.0  | 0.0   | 0.0   | 0.0   | 0.0  | 0.0  | 0.0  | 0.0  | 0.0  | 0.0  |
| 32AM2 | BaP IU-3 | BaP 40 | 164.5  | 0.8 | 0.0    | 0.0  | 0.0  | 0.0   | 0.0   | 0.0   | 0.0  | 0.0  | 0.0  | 0.0  | 0.0  | 0.0  |
| 32AM3 | BaP IU-3 | BaP 40 | 179.0  | 0.7 | 3.0    | 2.0  | 0.0  | 11.2  | 10.1  | 11.9  | 0.0  | 13.5 | 45.0 | 42.0 | 33.0 | 6.9  |
| 36AM1 | BaP IU-3 | BaP 40 | 141.0  | 0.6 | 0.5    | 0.5  | 0.5  | 20.5  | 14.6  | 44.0  | 1.6  | 0.0  | 35.5 | 16.5 | 11.0 | 8.8  |

**Table S5.** Raw data used to generate Figure 2A and Figure 2D, liver and testes somatic indices.

| <b>Dose Group</b> | <b>Animal weight (g)</b> | <b>Liver weight (g)</b> | <b>Left testis weight (g)</b> | <b>Right testis weight (g)</b> |
|-------------------|--------------------------|-------------------------|-------------------------------|--------------------------------|
| Control           | 27.2                     | 0.977                   | 0.105                         | 0.144                          |
| Control           | 26.1                     | 1.189                   | 0.100                         | 0.108                          |
| Control           | 21.8                     | 1.295                   | 0.118                         | 0.116                          |
| Control           | 32.3                     | 1.233                   | 0.066                         | 0.064                          |
| Control           | 26.7                     | 1.163                   | 0.106                         | 0.107                          |
| Control           | 28.3                     | 0.989                   | 0.097                         | 0.097                          |
| Control           | 29.4                     | 0.945                   | 0.100                         | 0.099                          |
| Control           | 30.0                     | 1.125                   | 0.121                         | 0.199                          |
| Control           | 27.1                     | 1.044                   | 0.109                         | 0.114                          |
| Control           | 33.3                     | 1.093                   | 0.118                         | 0.135                          |
| Control           | 23.7                     | 0.985                   | 0.095                         | 0.099                          |
| Control           | 25.1                     | 1.225                   | 0.111                         | 0.114                          |
| Control           | 24.0                     | 0.926                   | 0.099                         | 0.092                          |
| Control           | 33.0                     | 1.092                   | 0.100                         | 0.108                          |
| Control           | 23.9                     | 0.901                   | 0.094                         | 0.100                          |
| Control           | 24.6                     | 1.028                   | 0.107                         | 0.033                          |
| Control           | 50.8                     | 1.183                   | 0.124                         | 0.132                          |
| Control           | 32.8                     | 1.388                   | 0.127                         | 0.125                          |
| BaP 10            | 23.6                     | 1.094                   | 0.069                         | 0.071                          |
| BaP 10            | 23.9                     | 1.042                   | 0.013                         | 0.032                          |
| BaP 10            | 24.0                     | 0.908                   | 0.167                         | 0.172                          |
| BaP 10            | 28.1                     | 0.970                   | 0.099                         | 0.093                          |
| BaP 10            | 25.1                     | 1.120                   | 0.113                         | 0.112                          |
| BaP 10            | 25.9                     | 1.064                   | 0.097                         | 0.105                          |
| BaP 10            | 24.0                     | 1.253                   | 0.091                         | 0.094                          |
| BaP 10            | 25.2                     | 0.991                   | 0.086                         | 0.092                          |
| BaP 10            | 28.5                     | 1.202                   | 0.107                         | 0.104                          |
| BaP 10            | 30.5                     | 1.408                   | 0.112                         | 0.089                          |
| BaP 10            | 23.2                     | 0.894                   | 0.071                         | 0.076                          |

|        |      |       |       |       |
|--------|------|-------|-------|-------|
| BaP 20 | 32.1 | 1.201 | 0.046 | 0.042 |
| BaP 20 | 35.4 | 1.355 | 0.073 | 0.072 |
| BaP 20 | 28.7 | 1.165 | 0.068 | 0.079 |
| BaP 20 | 30.5 | 1.121 | 0.025 | 0.038 |
| BaP 20 | 23.6 | 0.834 | 0.050 | 0.059 |
| BaP 20 | 32.7 | 1.251 | 0.087 | 0.088 |
| BaP 20 | 28.6 | 2.540 | 0.039 | 0.043 |
| BaP 20 | 25.0 | 2.648 | 0.049 | 0.050 |
| BaP 20 | 23.8 | 2.530 | 0.036 | 0.043 |
| BaP 20 | 23.9 | 0.874 | 0.035 | 0.043 |
| BaP 20 | 20.7 | 0.828 | 0.042 | 0.030 |
| BaP 20 | 24.3 | 0.964 | 0.026 | 0.033 |
| BaP 20 | 32.0 | 1.237 | 0.059 | 0.055 |
| BaP 20 | 27.2 | 2.514 | 0.046 | 0.054 |
| BaP 20 | 27.7 | 1.089 | 0.061 | 0.052 |
| BaP 20 | 25.1 | 0.966 | 0.044 | 0.056 |
| BaP 40 | 23.8 | 0.954 | 0.017 | 0.017 |
| BaP 40 | 25.4 | 1.050 | 0.023 | 0.024 |
| BaP 40 | 23.4 | 0.935 | 0.015 | 0.013 |
| BaP 40 | 22.6 | 0.795 | 0.016 | 0.022 |
| BaP 40 | 27.0 | 1.046 | 0.028 | 0.026 |
| BaP 40 | 20.5 | 0.805 | 0.018 | 0.015 |
| BaP 40 | 28.8 | 1.243 | 0.031 | 0.031 |
| BaP 40 | 31.3 | 1.152 | 0.022 | 0.018 |
| BaP 40 | 25.2 | 0.943 | 0.026 | 0.039 |

## Supporting References

- Beal MA, Gagné R, Williams A, Marchetti F, Yauk CL. 2015. Characterizing Benzo[a]pyrene-induced lacZ mutation spectrum in transgenic mice using next-generation sequencing. *BMC Genomics* 16:812; doi:10.1186/s12864-015-2004-4.
- Hakura A, Tsutsui Y, Sonoda J, Kai J, Imade T, Shimada M, et al. 1998. Comparison between in vivo mutagenicity and carcinogenicity in multiple organs by benzo[a]pyrene in the lacZ transgenic mouse (Muta Mouse). *Mutat. Res.* 398: 123–30.
- Lemieux CL, Douglas GR, Gingerich J, Phonethepswath S, Torous DK, Dertinger SD, et al. 2011. Simultaneous measurement of benzo[a]pyrene-induced Pig-a and lacZ mutations, micronuclei and DNA adducts in Muta<sup>TM</sup> Mouse. *Environ. Mol. Mutagen.* 52:756–65; doi:10.1002/em.20688.
- Moffat I, Chepelev NL, Labib S, Bourdon-Lacombe J, Kuo B, Buick JK, et al. 2015. Comparison of toxicogenomics and traditional approaches to inform mode of action and points of departure in human health risk assessment of benzo[a]pyrene in drinking water. *Crit. Rev. Toxicol.* 45:1–43; doi:10.3109/10408444.2014.973934.
- O'Brien JM, Beal MA, Yauk CL, Marchetti F. 2016. Benzo (a) pyrene is mutagenic in mouse spermatogonial stem cells and dividing spermatogonia. *Toxicological Sciences Epub*: May 13, 2016.
